# Supplementary material
Source: HighWire-hosted journal article supplement (https://www.cmajopen.ca/highwire/filestream/81301/field_highwire_adjunct_files/0/2018-0190-1-at.pdf)
Supplement: 2018-0190-1-at.pdf [file 2018-0190-1-at.pdf]

## Appendix 1 (as supplied by the authors)

| <b>Table S1. Characteristics of the original studies from which patients with suspected adverse drug events were enrolled into the chart review study on repeat adverse drug events.</b> |                                                                                                                                                                                                                                                                                                                                                                                                                                                                                                                          |                                                                                                                                                                                                                                                                                                                                                                                                                                                                                                                                                                                                                                                  |                                                                                                                                                                                                                                                                                                                                                                                                                                                                                                                                                                                               |
|------------------------------------------------------------------------------------------------------------------------------------------------------------------------------------------|--------------------------------------------------------------------------------------------------------------------------------------------------------------------------------------------------------------------------------------------------------------------------------------------------------------------------------------------------------------------------------------------------------------------------------------------------------------------------------------------------------------------------|--------------------------------------------------------------------------------------------------------------------------------------------------------------------------------------------------------------------------------------------------------------------------------------------------------------------------------------------------------------------------------------------------------------------------------------------------------------------------------------------------------------------------------------------------------------------------------------------------------------------------------------------------|-----------------------------------------------------------------------------------------------------------------------------------------------------------------------------------------------------------------------------------------------------------------------------------------------------------------------------------------------------------------------------------------------------------------------------------------------------------------------------------------------------------------------------------------------------------------------------------------------|
| <b>Study Title</b>                                                                                                                                                                       | <b>Cohort 1<sup>14</sup></b>                                                                                                                                                                                                                                                                                                                                                                                                                                                                                             | <b>Cohort 2<sup>16,17</sup></b>                                                                                                                                                                                                                                                                                                                                                                                                                                                                                                                                                                                                                  | <b>Cohort 3<sup>15</sup></b>                                                                                                                                                                                                                                                                                                                                                                                                                                                                                                                                                                  |
| <b>Design</b>                                                                                                                                                                            | Prospective<br>Observational                                                                                                                                                                                                                                                                                                                                                                                                                                                                                             | Prospective<br>Controlled clinical trial                                                                                                                                                                                                                                                                                                                                                                                                                                                                                                                                                                                                         | Prospective<br>Observational                                                                                                                                                                                                                                                                                                                                                                                                                                                                                                                                                                  |
| <b>Primary Study Objective</b>                                                                                                                                                           | To derive a clinical decision instrument to identify patients at high-risk of presenting with an ADE.                                                                                                                                                                                                                                                                                                                                                                                                                    | To evaluate the impact of emergency department-based pharmacist-led medication review on health outcomes.                                                                                                                                                                                                                                                                                                                                                                                                                                                                                                                                        | To validate clinical decision instruments to identify patients at high-risk of presenting with an ADE.                                                                                                                                                                                                                                                                                                                                                                                                                                                                                        |
| <b>Study Period</b>                                                                                                                                                                      | Jul. 1, 2008 - Jan. 31, 2009                                                                                                                                                                                                                                                                                                                                                                                                                                                                                             | Dec. 20, 2011 – Jan. 3, 2013                                                                                                                                                                                                                                                                                                                                                                                                                                                                                                                                                                                                                     | Sept. 1, 2014 – Aug. 31, 2015                                                                                                                                                                                                                                                                                                                                                                                                                                                                                                                                                                 |
| <b>Hospitals</b>                                                                                                                                                                         | VGH, SPH                                                                                                                                                                                                                                                                                                                                                                                                                                                                                                                 | VGH, LGH, RGH*                                                                                                                                                                                                                                                                                                                                                                                                                                                                                                                                                                                                                                   | VGH, LGH, OCH*                                                                                                                                                                                                                                                                                                                                                                                                                                                                                                                                                                                |
| <b>Participants</b>                                                                                                                                                                      | <p><b>Included</b></p> <ul style="list-style-type: none"> <li>• <math>\geq 19</math> years</li> <li>• Used <math>\geq 1</math> prescription or OTC medication in the past 2 weeks</li> <li>• Spoke English or translator available</li> </ul> <p><b>Excluded</b></p> <ul style="list-style-type: none"> <li>• Violent behaviour</li> <li>• Intentional self-poisoning</li> <li>• Scheduled revisit</li> <li>• Previously enrolled</li> <li>• Transferred directly to an admitting service</li> <li>• Left AMA</li> </ul> | <p><b>Included</b></p> <ul style="list-style-type: none"> <li>• <math>\geq 19</math> years</li> <li>• Used <math>\geq 1</math> prescription or OTC medication in the past 2 weeks</li> <li>• Spoke English or translator available</li> <li>• High-risk based on ADE decision rule (Appendix E)<sup>10,11</sup></li> </ul> <p><b>Excluded</b></p> <ul style="list-style-type: none"> <li>• Required immediate resuscitation (CTAS=1).<sup>25</sup></li> <li>• Multisystem trauma</li> <li>• Scheduled re-visit</li> <li>• Sexual assault</li> <li>• Surgical complication</li> <li>• Pregnancy complication</li> <li>• Social problem</li> </ul> | <p><b>Included</b></p> <ul style="list-style-type: none"> <li>• <math>\geq 19</math> years</li> <li>• Used <math>\geq 1</math> prescription or OTC medication in the past 2 weeks</li> <li>• Spoke English or translator available</li> </ul> <p><b>Excluded</b></p> <ul style="list-style-type: none"> <li>• Violent behaviour</li> <li>• Intentional self-poisoning</li> <li>• Scheduled revisit</li> <li>• Previously enrolled</li> <li>• Needle stick injury</li> <li>• Sexual assault</li> <li>• Triaged to fast track zone where time to disposition too rapid for enrolment</li> </ul> |

|                                                                                      |                                                                                                                                                                                                                                                                                                                                                                                                                                      |                                                                                                                                                                                                    |                                                                                                                                                                                                |
|--------------------------------------------------------------------------------------|--------------------------------------------------------------------------------------------------------------------------------------------------------------------------------------------------------------------------------------------------------------------------------------------------------------------------------------------------------------------------------------------------------------------------------------|----------------------------------------------------------------------------------------------------------------------------------------------------------------------------------------------------|------------------------------------------------------------------------------------------------------------------------------------------------------------------------------------------------|
|                                                                                      |                                                                                                                                                                                                                                                                                                                                                                                                                                      |                                                                                                                                                                                                    | <ul style="list-style-type: none"> <li>• Transferred directly to admitting service</li> <li>• Left AMA</li> </ul>                                                                              |
| <b>Enrolment</b><br>(Appendix B)                                                     | Random selection of first patient within hour of start of data collection, subsequent systematic selection of every n <sup>th</sup> patient                                                                                                                                                                                                                                                                                          | Random selection of first patient within hour of start of data collection, subsequent systematic selection of every n <sup>th</sup> patient                                                        | Random selection of first patient within hour of start of data collection, subsequent systematic selection of every n <sup>th</sup> patient                                                    |
| <b>ADE definition</b>                                                                | “Untoward and unintended event arising from the use of prescription or OTC medications.” <sup>13,15,26</sup>                                                                                                                                                                                                                                                                                                                         | Same as in cohort 1. In addition, medication-related problems were captured and documented.                                                                                                        | “Untoward and unintended event arising from the appropriate or inappropriate use of a prescription or OTC medication.”                                                                         |
| <b>Data Collection Process – for Prospective Cohort Studies</b><br>(Appendix C)      | Trained clinical pharmacist & treating physician independently evaluated enrolled patients for ADEs. An independent committee adjudicated all discordant and uncertain cases by record review.                                                                                                                                                                                                                                       | Clinical pharmacists working in the ED & treating physician independently evaluated enrolled patients for ADEs. Clinical pharmacists and physicians discussed uncertain or discordant cases in ED. | Trained clinical pharmacist & treating physician independently evaluated enrolled patients for ADEs. An independent committee adjudicated all discordant and uncertain cases by record review. |
| <b>Data Collection Process – for Retrospective Chart Review Study on Repeat ADEs</b> | A clinical pharmacist (uninvolved in any of the prior studies) and a physician reviewed all cases diagnosed with a medication-related problem or ADE in the three prospective studies (Cohorts 1-3). The clinical pharmacist and physician reviewed all medical and research records to ensure consistent application of study definitions, and excluded any cases in which an alternative diagnosis to the ADE had since been made. |                                                                                                                                                                                                    |                                                                                                                                                                                                |
| <b>Follow-up Duration</b>                                                            | Until ED/hospital discharge, and by telephone follow-up if required                                                                                                                                                                                                                                                                                                                                                                  | Until ED/hospital discharge, linkage with administrative database for health outcomes                                                                                                              | Until ED/hospital discharge, and by telephone follow-up if required                                                                                                                            |
| <b>No. Participants</b>                                                              | 1,591                                                                                                                                                                                                                                                                                                                                                                                                                                | 10,807                                                                                                                                                                                             | 1,529                                                                                                                                                                                          |

|                                                                                                                                                                                                                                                                                                                                                                                                                                                                                                                                   |       |       |       |
|-----------------------------------------------------------------------------------------------------------------------------------------------------------------------------------------------------------------------------------------------------------------------------------------------------------------------------------------------------------------------------------------------------------------------------------------------------------------------------------------------------------------------------------|-------|-------|-------|
| <b>No. Participants enrolled in current study</b>                                                                                                                                                                                                                                                                                                                                                                                                                                                                                 | 1,591 | 9,913 | 1,473 |
| VGH=Vancouver General Hospital, a tertiary care hospital in Vancouver, BC, Canada; SPH=Saint Paul's Hospital, a tertiary care hospital in Vancouver, BC, Canada; LGH= Lions Gate Hospital, an urban community hospital in North Vancouver, BC, Canada; RGH=Richmond General Hospital, an urban community hospital in Richmond, BC, Canada; OCH=Ottawa Civic Hospital, a tertiary care hospital in Ottawa, ON, Canada; ADE=adverse drug event; AMA=against medical advice; OTC=over-the-counter; CTAS=Canadian Triage Acuity Score |       |       |       |

\* We excluded patients recruited into the primary studies at RGH and OCH as we were unable to access their charts for the study on repeat adverse drug events.

**Figure S1. Patient Enrolment Algorithm**

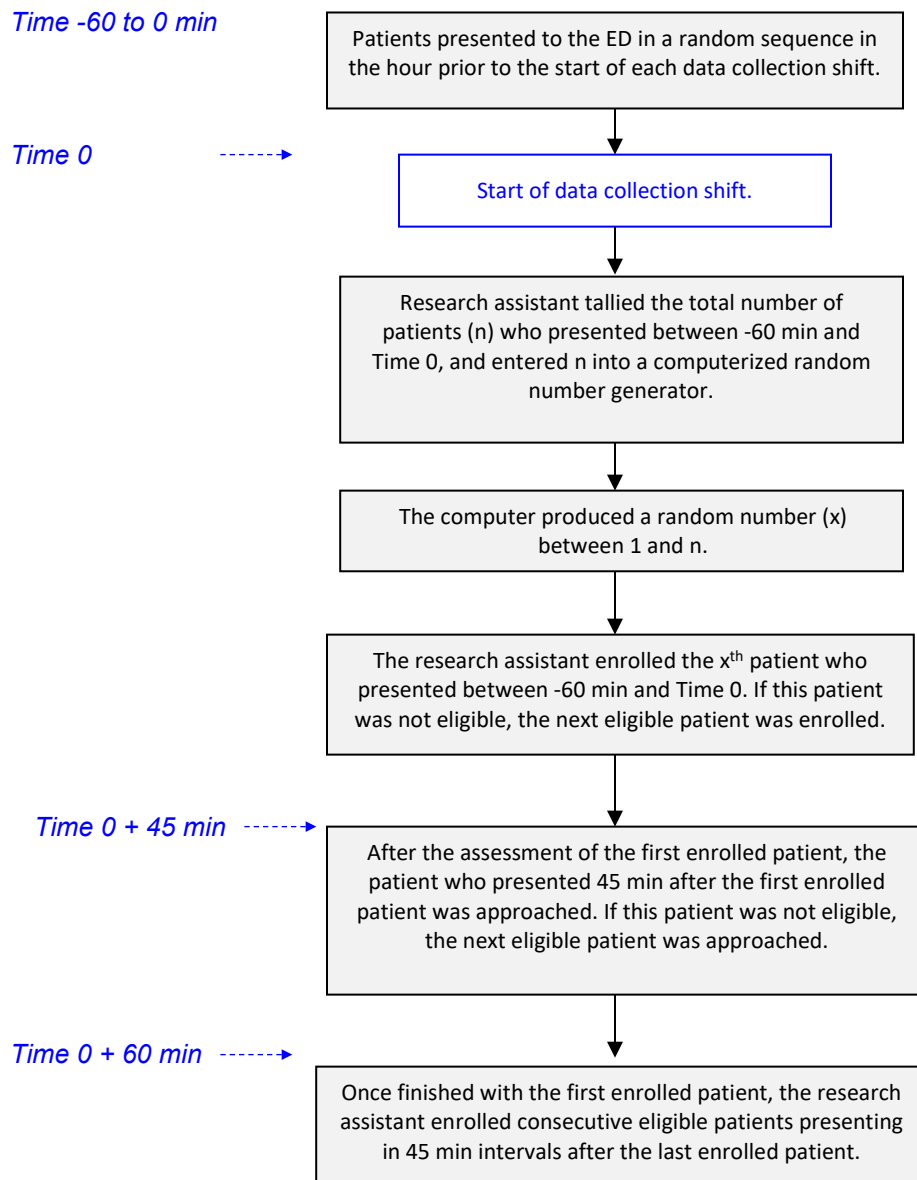

**Figure S2. Adjudication Algorithm for Adverse Drug Events in the Prospective Cohort Studies**

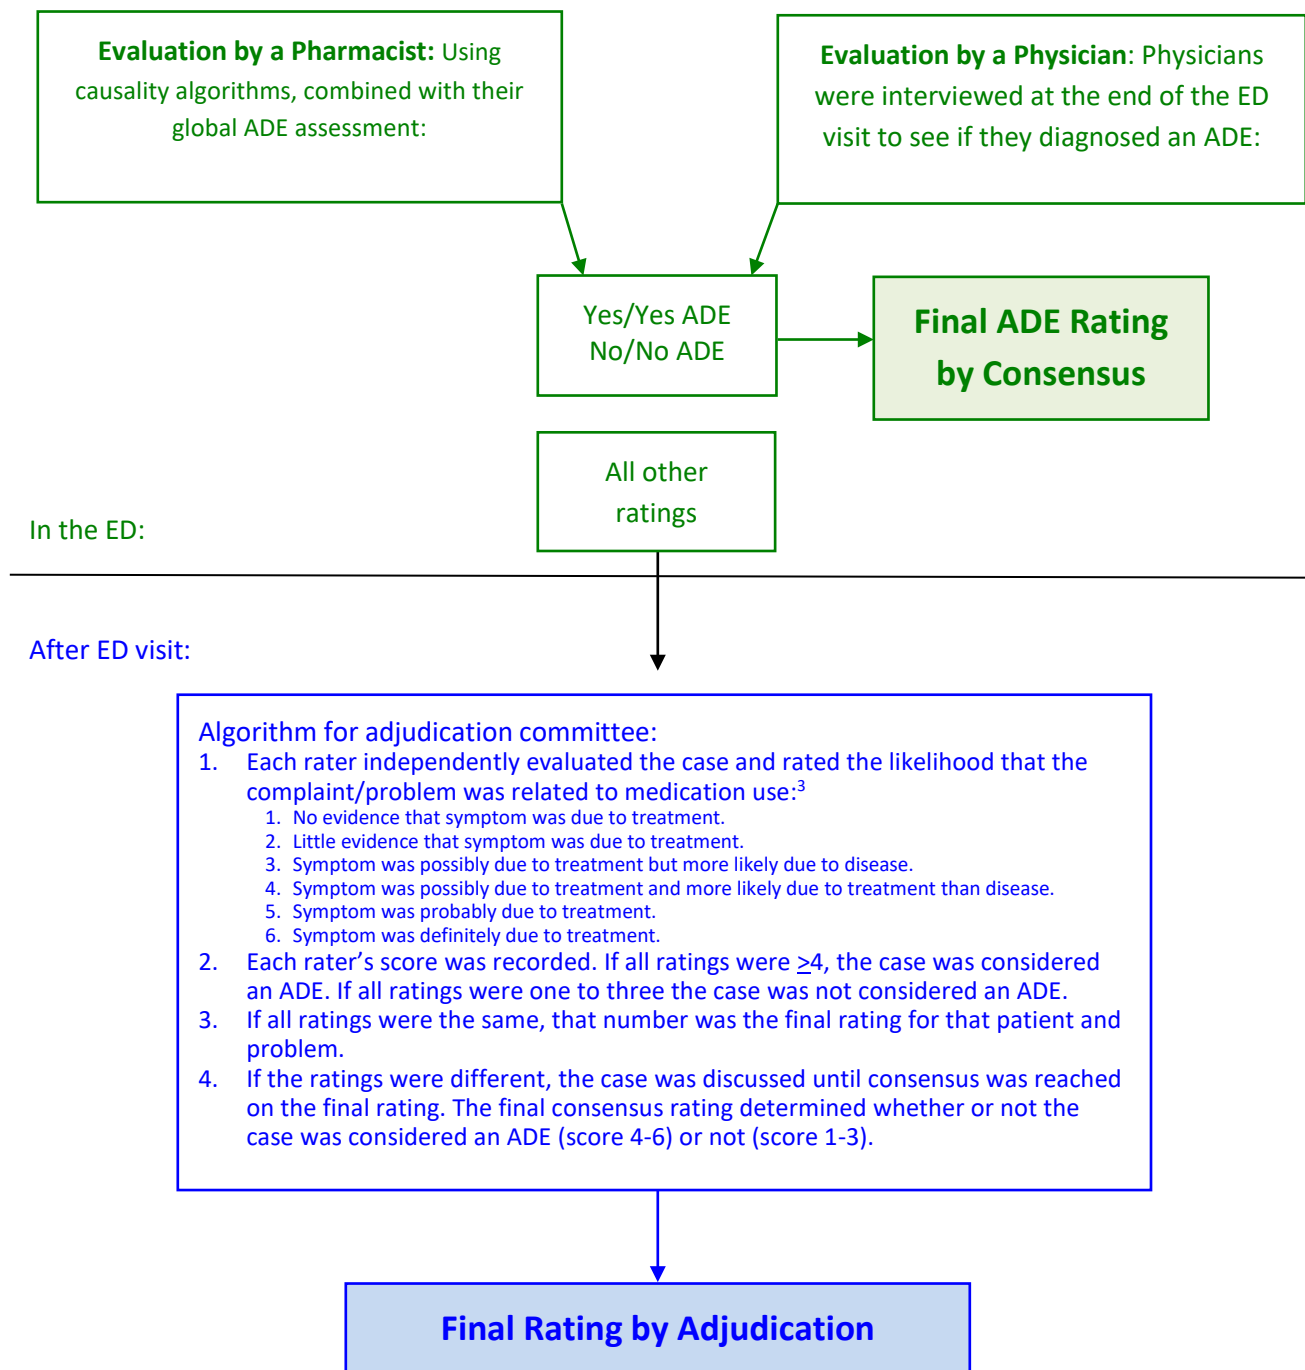

**Table S2. Study Definitions**

|                                                                                                                                                                                                                                                                                                                                                                                                                                                                                                                                                                                                                                                                                                                                                                                                                                                                                                                                                                                                                                                                                                                                                                                                                                                                                                                                                                                                                                                                                                                                                                                                                                                                                                                                                                       |
|-----------------------------------------------------------------------------------------------------------------------------------------------------------------------------------------------------------------------------------------------------------------------------------------------------------------------------------------------------------------------------------------------------------------------------------------------------------------------------------------------------------------------------------------------------------------------------------------------------------------------------------------------------------------------------------------------------------------------------------------------------------------------------------------------------------------------------------------------------------------------------------------------------------------------------------------------------------------------------------------------------------------------------------------------------------------------------------------------------------------------------------------------------------------------------------------------------------------------------------------------------------------------------------------------------------------------------------------------------------------------------------------------------------------------------------------------------------------------------------------------------------------------------------------------------------------------------------------------------------------------------------------------------------------------------------------------------------------------------------------------------------------------|
| <b>Adverse Drug Event (ADE):</b><br>“Unintended and harmful symptoms, signs or abnormal laboratory values arising from the appropriate or inappropriate use of medications (prescription, over-the-counter or complimentary & alternative medications).”<br>“Harm caused by the use of a drug.” <ul style="list-style-type: none"><li>- The sign(s) or symptom(s) are generally <i>not</i> deemed to have an alternate explanation by the pharmacist <i>and</i> the treating physician. In cases where alternative causes are possible (<i>e.g.</i>, fall), the event should only be considered a suspect adverse drug event, if it is likely that the symptom would not have been as severe or not have occurred without the patient being on the drug (<i>e.g.</i>, intracranial hemorrhage).</li><li>- Abnormal vital signs may constitute an adverse drug event, if the abnormal vital signs meets the cut-offs below, and treating the adverse drug event is medically appropriate according to the treating physician:<ul style="list-style-type: none"><li>o <math>HR \leq 50</math> and associated with symptoms (<i>e.g.</i>, pre-syncope/syncope, prolonged sinus pauses on ECG)</li><li>o <math>HR \geq 120</math> and associated with symptoms (<i>e.g.</i>, pre-syncope/syncope, chest pain or palpitations)</li><li>o <math>BP \geq 180</math> SBP or <math>\geq 100</math> DBP</li></ul></li><li>- Abnormal laboratory tests can be considered an adverse drug event if they are outside of the hospital’s reference range, and treating the adverse drug event is medically appropriate according to the treating physician.</li><li>- Harm caused by the use of alcohol or illicit drugs does <i>not</i> constitute an adverse drug event.</li></ul> |
| <b>ADE Classification:</b><br><b>Adverse Drug Reaction (ADR):</b> “A response to a drug that is noxious and unintended, and occurs at doses normally used in man for the prophylaxis, diagnosis or therapy of disease”<br><b>Drug interaction</b><br><b>Dosage Too High</b><br><b>Dosage Too Low</b><br><b>Non-adherence</b><br><b>Inappropriate Drug Withdrawal</b><br><b>Ineffective Drug</b><br><b>Needs Additional Drug/Untreated Indication:</b> This categorization should be reserved for cases in which there is clear previous documentation ( <i>i.e.</i> , before the index ED visit) in the patient’s records about a hard indication for the drug, and lack of contra-indication for treatment.<br><b>Transcription/Dispensing/Administration Error</b>                                                                                                                                                                                                                                                                                                                                                                                                                                                                                                                                                                                                                                                                                                                                                                                                                                                                                                                                                                                                  |
| <b>ADE Severity:</b><br><b>Fatal:</b> The adverse event resulted in death.<br><b>Severe:</b> The adverse drug event was primary reason for patient’s hospitalization, caused permanent disability or was life-threatening.<br><b>Moderate:</b> The adverse event required a change in medical management (medical therapy, a diagnostic procedure or consultation)<br><b>Mild:</b> No change in medical therapy, including no adjustment of medications required.                                                                                                                                                                                                                                                                                                                                                                                                                                                                                                                                                                                                                                                                                                                                                                                                                                                                                                                                                                                                                                                                                                                                                                                                                                                                                                     |

**Table S3. Culprit drug and drug class implicated in 1296 adverse drug events**

|                                   | Repeat<br>Adverse Drug Events<br>(n=421) |                    | First Occurrence<br>Adverse Drug Events<br>(n=875) |                    |
|-----------------------------------|------------------------------------------|--------------------|----------------------------------------------------|--------------------|
|                                   | <i>no.</i>                               | <i>% (95% CI*)</i> | <i>no.</i>                                         | <i>% (95% CI*)</i> |
| <b>No. Implicated Medications</b> |                                          |                    |                                                    |                    |
| One                               | 318                                      | 75.5 (71.4-79.7)   | 643                                                | 73.5 (70.5-76.4)   |
| Two                               | 66                                       | 15.7 (12.1-19.2)   | 162                                                | 18.5 (15.9-21.1)   |
| Three                             | 25                                       | 5.9 (3.7-8.2)      | 46                                                 | 5.3 (3.7-6.8)      |
| More than three                   | 12                                       | 2.9 (1.3-4.4)      | 24                                                 | 2.7 (1.7-3.8)      |
| <b>Top Culprit Medications</b>    |                                          |                    |                                                    |                    |
| Warfarin                          | 52                                       | 12.4 (9.2-15.5)    | 105                                                | 12.0 (9.9-14.1)    |
| Insulin                           | 34                                       | 8.1 (5.5-10.7)     | 20                                                 | 2.3 (1.3-3.3)      |
| Hydrochlorothiazide               | 23                                       | 5.5 (3.2-7.7)      | 42                                                 | 4.8 (3.4-6.2)      |
| Furosemide                        | 18                                       | 4.3 (2.4-6.2)      | 50                                                 | 5.7 (4.2-7.3)      |
| Oxycodone                         | 17                                       | 4.0 (2.0-6.0)      | 10                                                 | 1.1(0.4-1.8)       |
| Hydromorphone                     | 17                                       | 4.0 (2.2-5.9)      | 27                                                 | 3.1 (1.9-4.3)      |
| Phenytoin                         | 12                                       | 2.9 (1.3-4.4)      | 20                                                 | 2.3 (1.2-3.3)      |
| Codeine                           | 12                                       | 2.9 (1.3-4.4)      | 32                                                 | 3.7 (2.4-4.9)      |

|                                             |    |                 |     |                 |
|---------------------------------------------|----|-----------------|-----|-----------------|
| Ramipril                                    | 11 | 2.6 (1.1-4.1)   | 23  | 2.6 (1.6-3.7)   |
| Acetaminophen                               | 11 | 2.6 (1.1-4.1)   | 21  | 2.4 (1.4-3.4)   |
| Quetiapine                                  | 11 | 2.6 (1.1-4.1)   | 15  | 1.7 (0.9-2.6)   |
| <b>Top Culprit Medication<br/>Classes</b>   |    |                 |     |                 |
| Coumarin derivatives                        | 52 | 12.4 (9.2-15.5) | 105 | 12.0 (9.9-14.1) |
| Opiate agonists                             | 51 | 12.1 (8.9-15.4) | 95  | 10.9 (8.8-12.9) |
| Insulins                                    | 34 | 8.1 (5.5-10.7)  | 20  | 2.3 (1.3-3.3)   |
| Atypical antipsychotics                     | 24 | 5.7 (3.5-7.9)   | 36  | 4.1 (2.8-5.4)   |
| Miscellaneous<br>anticonvulsants            | 23 | 5.5 (3.3-7.6)   | 26  | 3.0 (1.8-4.1)   |
| Thiazide diuretics                          | 23 | 5.5 (3.2-7.7)   | 42  | 4.8 (3.4-6.2)   |
| Beta-adrenergic blocking<br>agents          | 20 | 4.8 (2.7-6.8)   | 36  | 4.1 (2.8-5.4)   |
| Adrenals                                    | 19 | 4.5 (2.4-6.6)   | 38  | 4.3 (3.0-5.7)   |
| Loop diuretics                              | 18 | 4.3 (2.4-6.2)   | 51  | 5.8 (4.3-7.4)   |
| Angiotensin-converting<br>enzyme inhibitors | 13 | 3.1 (1.4-4.7)   | 31  | 3.5 (2.3-4.8)   |
| Benzodiazepines                             | 13 | 3.1 (1.4-4.7)   | 26  | 3.0 (1.8-4.1)   |



| <b>Top Adverse Drug Event<br/>Symptoms</b>                                                                                        |    |                 |    |               |
|-----------------------------------------------------------------------------------------------------------------------------------|----|-----------------|----|---------------|
| Pain                                                                                                                              | 44 | 10.5 (7.5-13.4) | 59 | 7.3 (5.7-8.9) |
| Sub/suprathapeutic INR                                                                                                            | 41 | 9.7 (7.6-11.8)  | 64 | 7.4 (6.0-8.8) |
| Hyperglycemia                                                                                                                     | 24 | 5.7 (3.5-7.9)   | 39 | 4.7 (3.3-6.1) |
| Shortness of breath                                                                                                               | 19 | 5.8 (3.7-7.9)   | 45 | 5.5 (4.1-6.9) |
| Hypertension                                                                                                                      | 20 | 5.4 (3.4-7.4)   | 26 | 3.2 (1.9-4.5) |
| *95% confidence intervals (95%CI) adjusted for clustering of adverse drug event characteristics in patients with multiple events. |    |                 |    |               |

**Table S4. Culprit drug and drug class implicated in 462 adverse drug reactions**

|                                   | Repeat<br>Adverse Drug Reactios<br>(n=132) |                    | First Occurrence<br>Adverse Drug Reactions<br>(n=330) |                    |
|-----------------------------------|--------------------------------------------|--------------------|-------------------------------------------------------|--------------------|
|                                   | <i>no.</i>                                 | <i>% (95% CI*)</i> | <i>no.</i>                                            | <i>% (95% CI*)</i> |
| <b>No. Implicated Medications</b> |                                            |                    |                                                       |                    |
| One                               | 95                                         | 72.0 (64.2-79.8)   | 253                                                   | 76.7 (72.1-81.3)   |
| Two                               | 30                                         | 22.7 (15.5-29.9)   | 52                                                    | 15.8 (11.9-19.7)   |
| Three                             | 6                                          | 4.5 (1.0-8.0)      | 17                                                    | 5.2 (2.7-7.7)      |
| More than three                   | 1                                          | 0.8 (0.0-2.3)      | 8                                                     | 2.4 (1.2-3.6)      |
| <b>Top Culprit Medications</b>    |                                            |                    |                                                       |                    |
| Hydrochlorothiazide               | 13                                         | 6.4 (3.0-9.8)      | 40                                                    | 6.8 (4.8-8.8)      |
| Furosemide                        | 8                                          | 3.9 (1.2-6.6)      | 19                                                    | 3.2 (1.8-4.6)      |
| Oxycodone                         | 7                                          | 3.4 (0.9-5.9)      | 10                                                    | 1.7 (0.7-2.7)      |
| Prednisone                        | 7                                          | 3.4 (0.9-5.9)      | 18                                                    | 3.0 (1.6-4.4)      |
| Ramipril                          | 6                                          | 3.0 (0.7-5.3)      | 14                                                    | 2.4 (1.2-3.6)      |
| Glyburide                         | 6                                          | 3.0 (0.7-5.3)      | 10                                                    | 1.7 (0.7-2.7)      |
| Warfarin                          | 6                                          | 3.0 (0.7-5.3)      | 19                                                    | 3.2 (1.8-4.6)      |
| Acetylsalicylic acid              | 6                                          | 3.0 (0.7-5.3)      | 27                                                    | 4.6 (2.9-6.3)      |

|                                               |    |                 |    |                 |
|-----------------------------------------------|----|-----------------|----|-----------------|
| Cefalexin                                     | 5  | 2.4 (0.3-4.5)   | 14 | 2.4 (1.2-3.6)   |
| <b>Top Culprit Medication<br/>Classes</b>     |    |                 |    |                 |
| Opiate agonists                               | 14 | 10.6 (9.0-12.2) | 38 | 11.5 (9.0-14.0) |
| Thiazide diuretics                            | 13 | 9.8 (8.3-11.3)  | 27 | 8.2 (6.0-10.3)  |
| Beta-adrenergic blocking<br>agents            | 9  | 6.8 (5.6-8.1)   | 4  | 1.2 (0.4-2.0)   |
| Adrenals                                      | 8  | 6.1 (4.8-7.4)   | 20 | 6.1 (4.2-8.0)   |
| Angiotensin-converting<br>enzyme inhibitors   | 7  | 5.3 (4.2-6.4)   | 12 | 3.6 (2.2-5.1)   |
| Loop diuretics                                | 6  | 4.5 (3.5-5.5)   | 13 | 3.9 (2.4-5.4)   |
| Coumarin derivatives                          | 5  | 3.8 (2.9-4.7)   | 14 | 4.2 (2.6-5.8)   |
| Benzodiazepines                               | 3  | 2.3 (1.0-3.6)   | 4  | 1.2 (0.0-2.9)   |
| Atypical antipsychotics                       | 2  | 1.5 (0.7-2.3)   | 2  | 0.6 (0.0-1.4)   |
| Miscellaneous<br>anticonvulsants              | 1  | 0.8 (0.4-1.2)   | 4  | 1.2 (0.0-2.9)   |
| <b>Top Adverse Drug Reaction<br/>Symptoms</b> |    |                 |    |                 |
| Constipation                                  | 13 | 9.8 (4.8-14.8)  | 26 | 7.9 (5.0-10.8)  |
| Dizziness                                     | 10 | 7.5 (3.7-11.3)  | 15 | 4.4 (2.5-6.3)   |

|                                                                                                                                   |    |                |    |                |
|-----------------------------------------------------------------------------------------------------------------------------------|----|----------------|----|----------------|
| Diarrhea                                                                                                                          | 10 | 7.5 (3.4-11.6) | 22 | 6.2 (3.7-8.7)  |
| Rash                                                                                                                              | 9  | 6.0 (2.0-10.0) | 25 | 7.6 (4.7-10.5) |
| Hyponatremia                                                                                                                      | 8  | 5.3 (1.5-9.1)  | 21 | 6.1 (3.5-8.7)  |
| *95% confidence intervals (95%CI) adjusted for clustering of adverse drug event characteristics in patients with multiple events. |    |                |    |                |
